# Supplementary material
Source: PubMed Central journal article supplement (PMC7526050)
Supplement: NIHMS1627639-supplement-Supplemental_Figure_and_tables.pdf [file NIHMS1627639-supplement-Supplemental_Figure_and_tables.pdf]

**Supplemental Figure S1. Study selection schema.**

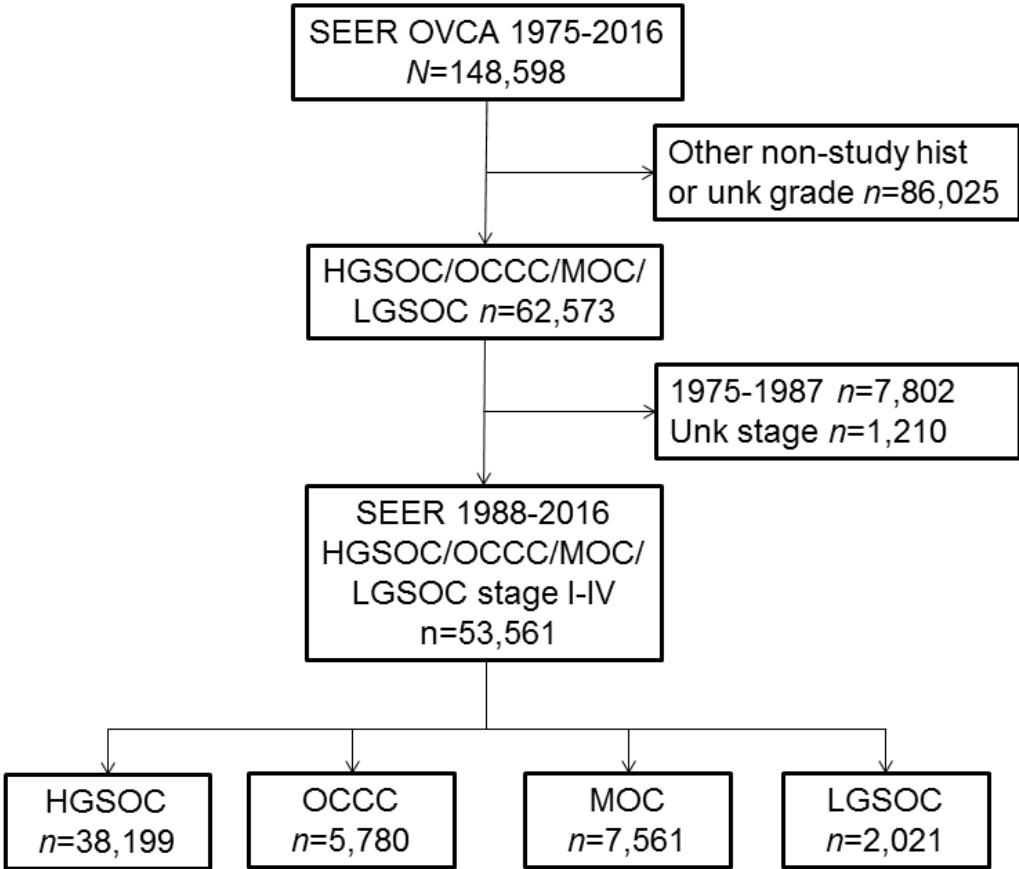

Abbreviations: OCCC, ovarian clear cell carcinoma; MOC, mucinous ovarian cancer; LGSOC, low-grade serous ovarian cancer; and HGSOC, high-grade serous ovarian cancer.

**Supplemental Table S1. Patient demographics per histology type (early-stage disease, n=11750).**

| Characteristics | HGSOC        | OCCC         | MOC          | LGSOC        | P-value |
|-----------------|--------------|--------------|--------------|--------------|---------|
| Number          | n=3269       | n=3293       | n=4501       | n=687        |         |
| Age (yr)        | 60.6 (±13.2) | 55.7 (±11.5) | 51.2 (±16.4) | 55.7 (±14.9) | <0.001  |
| <30             | 21 (0.6%)    | 19 (0.6%)    | 454 (10.1%)  | 22 (3.2%)    |         |
| 30-39           | 141 (4.3%)   | 204 (6.2%)   | 624 (13.9%)  | 74 (10.8%)   |         |
| 40-49           | 508 (15.5%)  | 782 (23.7%)  | 880 (19.6%)  | 153 (22.3%)  |         |
| 50-59           | 928 (28.4%)  | 1170 (35.5%) | 1119 (24.9%) | 163 (23.7%)  |         |
| 60-69           | 818 (25.0%)  | 715 (21.7%)  | 730 (16.2%)  | 139 (20.2%)  |         |
| 70-79           | 561 (17.2%)  | 296 (9.0%)   | 483 (10.7%)  | 94 (13.7%)   |         |
| ≥80             | 292 (8.9%)   | 107 (3.2%)   | 211 (4.7%)   | 42 (6.1%)    |         |
| Year            |              |              |              |              | <0.001  |
| 1988-1993       | 263 (8.8%)   | 241 (8.0%)   | 608 (14.9%)  | 107 (17.1%)  |         |
| 1994-1999       | 405 (13.6%)  | 347 (11.6%)  | 616 (15.0%)  | 117 (18.7%)  |         |
| 2000-2005       | 757 (25.4%)  | 742 (24.7%)  | 952 (23.3%)  | 166 (26.5%)  |         |
| 2006-2011       | 839 (28.2%)  | 849 (28.3%)  | 960 (23.4%)  | 135 (21.6%)  |         |
| 2012-2016       | 715 (24.0%)  | 824 (27.4%)  | 958 (23.4%)  | 101 (16.1%)  |         |
| Race/ethnicity  |              |              |              |              | <0.001  |
| White           | 2521 (77.1%) | 2296 (69.7%) | 3192 (70.9%) | 518 (75.4%)  |         |
| Black           | 179 (5.5%)   | 93 (2.8%)    | 264 (5.9%)   | 45 (6.6%)    |         |
| Hispanic        | 304 (9.3%)   | 306 (9.3%)   | 508 (11.3%)  | 78 (11.4%)   |         |
| Asian           | 227 (6.9%)   | 537 (16.3%)  | 440 (9.8%)   | 37 (5.4%)    |         |
| Others*         | 38 (1.2%)    | 61 (1.9%)    | 97 (2.2%)    | 9 (1.3%)     |         |
| Registry        |              |              |              |              | <0.001  |
| West            | 1742 (53.3%) | 1991 (60.5%) | 2428 (53.9%) | 336 (48.9%)  |         |
| Central         | 751 (23.0%)  | 537 (16.3%)  | 1014 (22.5%) | 150 (21.8%)  |         |
| East            | 776 (23.7%)  | 765 (23.2%)  | 1059 (23.5%) | 201 (29.3%)  |         |
| Marital status  |              |              |              |              | <0.001  |
| Single          | 526 (16.1%)  | 762 (23.1%)  | 1113 (24.7%) | 132 (19.2%)  |         |
| Married         | 1805 (55.2%) | 1834 (55.7%) | 2238 (49.7%) | 389 (56.6%)  |         |
| Others          | 101 (3.1%)   | 120 (3.6%)   | 170 (3.8%)   | 17 (2.5%)    |         |
| Unknown         | 837 (25.6%)  | 577 (17.5%)  | 980 (21.8%)  | 149 (21.7%)  |         |
| Stage           |              |              |              |              | <0.001  |
| IA              | 1326 (40.6%) | 1874 (56.9%) | 3212 (71.4%) | 365 (53.1%)  |         |
| IB              | 303 (9.3%)   | 71 (2.2%)    | 105 (2.3%)   | 61 (8.9%)    |         |
| IC              | 1553 (47.5%) | 1267 (38.5%) | 1049 (23.3%) | 233 (33.9%)  |         |
| INOS            | 87 (2.7%)    | 81 (2.5%)    | 135 (3.0%)   | 28 (4.1%)    |         |
| Tumor size (cm) |              |              |              |              | <0.001  |
| <5              | 669 (20.5%)  | 506 (15.4%)  | 705 (15.7%)  | 160 (23.3%)  |         |
| 5-9.9           | 674 (20.6%)  | 629 (19.1%)  | 386 (8.6%)   | 129 (18.8%)  |         |
| 10-14.9         | 557 (17.0%)  | 657 (20.0%)  | 473 (10.5%)  | 70 (10.2%)   |         |
| ≥15             | 485 (14.8%)  | 813 (24.7%)  | 1555 (34.5%) | 76 (11.1%)   |         |
| Unknown         | 884 (27.0%)  | 688 (20.9%)  | 1382 (30.7%) | 252 (36.7%)  |         |
| Oophorectomy    |              |              |              |              | 0.019   |
| No              | 26 (0.8%)    | 10 (0.3%)    | 36 (0.8%)    | 5 (0.7%)     |         |
| Yes             | 3232 (98.9%) | 3281 (99.6%) | 4455 (99.0%) | 681 (99.1%)  |         |
| NOS*            | 11 (0.3%)    | 2 (0.1%)     | 10 (0.2%)    | 1 (0.1%)     |         |
| Hysterectomy    |              |              |              |              | <0.001  |
| No              | 649 (19.9%)  | 395 (12.0%)  | 1214 (27.0%) | 139 (20.2%)  |         |
| Yes             | 2501 (76.5%) | 2789 (84.7%) | 3079 (68.4%) | 524 (76.3%)  |         |

|                 |               |               |               |                |        |
|-----------------|---------------|---------------|---------------|----------------|--------|
| Unknown         | 119 (3.6%)    | 109 (3.3%)    | 208 (4.6%)    | 24 (3.5%)      |        |
| Lymphadenectomy |               |               |               |                | <0.001 |
| No              | 1192 (36.5%)  | 826 (25.1%)   | 1887 (41.9%)  | 323 (47.0%)    |        |
| Yes             | 2069 (63.3%)  | 2463 (74.8%)  | 2601 (57.8%)  | 361 (52.5%)    |        |
| Unknown         | 8 (0.2%)      | 4 (0.1%)      | 13 (0.3%)     | 3 (0.4%)       |        |
| Sampled nodes** | 12 (IQR 6-20) | 13 (IQR 6-21) | 10 (IQR 5-18) | 9 (IQR 4.5-19) | <0.001 |
| Chemotherapy    |               |               |               |                | <0.001 |
| No              | 1275 (39.0%)  | 1045 (31.7%)  | 3244 (72.1%)  | 494 (71.9%)    |        |
| Yes             | 1994 (61.0%)  | 2248 (68.3%)  | 1257 (27.9%)  | 193 (28.1%)    |        |

Number (percentage per column), mean ( $\pm$ standard deviation), or median (interquartile range) is shown. One-way ANOVA test, Kruskal-Wallis  $H$  test, or chi-square test for  $P$ -values. \*including unknown. \*\*among staged cases. Abbreviations: IQR, interquartile range; NOS, not otherwise specified; HGSOC, high-grade serous ovarian carcinoma; OCCC, ovarian clear cell carcinoma; MOC, mucinous ovarian carcinoma; and LGSOC, low-grade serous ovarian carcinoma.

**Supplemental Table S2. Patient demographics per histology type (advanced-stage disease, n=37399).**

| Characteristics  | HGSOC           | OCCC           | MOC             | LGSOC          | P-value |
|------------------|-----------------|----------------|-----------------|----------------|---------|
| Number           | n=31874         | n=1842         | n=2568          | n=1115         |         |
| Age              | 63.0 (±12.1)    | 58.2 (±12.3)   | 62.4 (±15.3)    | 55.7 (±12.7)   | <0.001  |
| <30              | 132 (0.4%)      | 5 (0.3%)       | 57 (2.2%)       | 73 (6.5%)      |         |
| 30-39            | 727 (2.3%)      | 101 (5.5%)     | 134 (5.2%)      | 125 (11.2%)    |         |
| 40-49            | 3797 (11.9%)    | 351 (19.1%)    | 344 (13.4%)     | 201 (18.0%)    |         |
| 50-59            | 7723 (24.2%)    | 570 (30.9%)    | 550 (21.4%)     | 240 (21.5%)    |         |
| 60-69            | 9380 (29.4%)    | 474 (25.7%)    | 559 (21.8%)     | 232 (20.8%)    |         |
| 70-79            | 7373 (23.1%)    | 257 (14.0%)    | 562 (21.9%)     | 165 (14.8%)    |         |
| ≥80              | 2742 (8.6%)     | 84 (4.6%)      | 362 (14.1%)     | 79 (7.1%)      |         |
| Year             |                 |                |                 |                | <0.001  |
| 1988-1993        | 2477 (8.5%)     | 140 (8.5%)     | 383 (16.2%)     | 133 (13.0%)    |         |
| 1994-1999        | 3652 (12.6%)    | 184 (11.1%)    | 453 (19.2%)     | 171 (16.7%)    |         |
| 2000-2005        | 7869 (27.1%)    | 459 (27.8%)    | 747 (31.7%)     | 336 (32.7%)    |         |
| 2006-2011        | 8206 (27.1%)    | 479 (29.0%)    | 481 (20.4%)     | 223 (21.7%)    |         |
| 2012-2016        | 6837 (23.5%)    | 392 (23.7%)    | 296 (12.5%)     | 164 (16.0%)    |         |
| Race/ethnicity   |                 |                |                 |                | <0.001  |
| White            | 24722 (77.6%)   | 1304 (70.8%)   | 1761 (68.6%)    | 868 (77.8%)    |         |
| Black            | 2000 (6.3%)     | 106 (5.8%)     | 309 (12.0%)     | 81 (7.3%)      |         |
| Hispanic         | 2946 (9.2%)     | 159 (8.6%)     | 299 (11.6%)     | 116 (10.4%)    |         |
| Asian            | 1807 (5.7%)     | 248 (13.5%)    | 158 (6.2%)      | 37 (3.3%)      |         |
| Others*          | 399 (1.3%)      | 25 (1.4%)      | 41 (1.6%)       | 13 (1.2%)      |         |
| Registry area    |                 |                |                 |                | <0.001  |
| West             | 18121 (56.9%)   | 1097 (59.6%)   | 1366 (53.2%)    | 604 (54.2%)    |         |
| Central          | 5906 (18.5%)    | 324 (17.6%)    | 583 (22.7%)     | 228 (20.4%)    |         |
| East             | 7847 (24.6%)    | 421 (22.9%)    | 619 (24.1%)     | 283 (25.4%)    |         |
| Marital status   |                 |                |                 |                | <0.001  |
| Single           | 4160 (13.1%)    | 422 (22.9%)    | 489 (19.0%)     | 216 (19.4%)    |         |
| Married          | 17550 (55.1%)   | 974 (52.9%)    | 1134 (44.2%)    | 598 (53.6%)    |         |
| Others           | 940 (2.9%)      | 59 (3.2%)      | 76 (3.0%)       | 24 (2.2%)      |         |
| Unknown          | 9224 (28.9%)    | 387 (21.0%)    | 869 (33.8%)     | 277 (24.8%)    |         |
| Stage            |                 |                |                 |                | <0.001  |
| III              | 20916 (65.6%)   | 1237 (67.2%)   | 1395 (54.3%)    | 861 (77.2%)    |         |
| IV               | 10958 (34.4%)   | 605 (32.8%)    | 1173 (45.7%)    | 254 (22.8%)    |         |
| Nodal metastasis |                 |                |                 |                | <0.001  |
| No               | 5191 (16.3%)    | 423 (23.0%)    | 389 (15.1%)     | 231 (20.7%)    |         |
| Yes              | 8793 (27.6%)    | 607 (33.0%)    | 330 (12.9%)     | 326 (29.2%)    |         |
| Unstaged         | 17890 (56.1%)   | 812 (44.1%)    | 1849 (72.0%)    | 558 (50.0%)    |         |
| LNR**            | 50 (IQR 18-100) | 33 (IQR 13-69) | 33 (IQR 13-100) | 29 (IQR 14-67) | <0.001  |
| Tumor size (cm)  |                 |                |                 |                | <0.001  |
| <5               | 5043 (15.8%)    | 155 (8.4%)     | 173 (6.7%)      | 184 (16.5%)    |         |
| 5-9.9            | 7164 (22.5%)    | 321 (17.4%)    | 269 (10.5%)     | 234 (21.0%)    |         |
| 10-14.9          | 4299 (13.5%)    | 383 (20.8%)    | 265 (10.3%)     | 128 (11.5%)    |         |
| ≥15              | 2314 (7.3%)     | 422 (22.9%)    | 464 (18.1%)     | 106 (9.5%)     |         |
| Unknown          | 13054 (41.0%)   | 561 (30.5%)    | 1397 (54.4%)    | 463 (41.5%)    |         |
| Oophorectomy     |                 |                |                 |                | <0.001  |
| No               | 1640 (5.1%)     | 148 (8.0%)     | 684 (26.6%)     | 56 (5.0%)      |         |
| Yes              | 29999 (94.1%)   | 1682 (91.3%)   | 1830 (71.3%)    | 1049 (94.1%)   |         |
| NOS*             | 235 (0.7%)      | 12 (0.7%)      | 54 (2.1%)       | 10 (0.9%)      |         |

|                 |               |               |              |               |        |
|-----------------|---------------|---------------|--------------|---------------|--------|
| Hysterectomy    |               |               |              |               | <0.001 |
| No              | 4192 (13.2%)  | 255 (13.8%)   | 983 (38.3%)  | 196 (17.6%)   |        |
| Yes             | 24741 (77.6%) | 1455 (79.0%)  | 1313 (51.1%) | 785 (70.4%)   |        |
| Unknown         | 2941 (9.2%)   | 132 (7.2%)    | 272 (10.6%)  | 134 (12.0%)   |        |
| Lymphadenectomy |               |               |              |               | <0.001 |
| No              | 17737 (55.6%) | 796 (43.2%)   | 1802 (70.2%) | 552 (49.5%)   |        |
| Yes             | 13934 (43.7%) | 1028 (55.8%)  | 721 (28.1%)  | 556 (49.9%)   |        |
| Unknown         | 203 (0.6%)    | 18 (1.0%)     | 45 (1.8%)    | 7 (0.6%)      |        |
| Sampled nodes** | 10 (IQR 3-23) | 12 (IQR 4-23) | 9 (IQR 3-25) | 11 (IQR 5-23) | 0.004  |
| Chemotherapy    |               |               |              |               | <0.001 |
| No              | 5350 (16.8%)  | 368 (20.0%)   | 944 (36.8%)  | 255 (22.9%)   |        |
| Yes             | 26524 (83.2%) | 1474 (80.0%)  | 1624 (63.2%) | 860 (77.1%)   |        |

Number (percentage per column), mean ( $\pm$ standard deviation), or median (interquartile range) is shown. One-way ANOVA test, Kruskal-Wallis *H* test, or chi-square test for *P*-values. \*including unknown. \*\*among staged cases. Abbreviations: IQR, interquartile range; NOS, not otherwise specified; LNR, lymph node ratio; HGSOC, high-grade serous ovarian carcinoma; OCCC, ovarian clear cell carcinoma; MOC, mucinous ovarian carcinoma; and LGSOC, low-grade serous ovarian carcinoma.

**Supplemental Table S3. Demographics after propensity score match for OCCC versus HGSOC (early stage).**

| Characteristics | HGSOC          | OCCC           | SD    |
|-----------------|----------------|----------------|-------|
| Number          | <i>n</i> =2368 | <i>n</i> =2368 |       |
| Age             | 57.8 (±12.4)   | 57.6 (±11.7)   | 0.01  |
| Year            |                |                | <0.01 |
| 1988-1993       | 182 (8.8%)     | 186 (9.0%)     |       |
| 1994-1999       | 268 (12.9%)    | 262 (12.6%)    |       |
| 2000-2005       | 518 (24.9%)    | 527 (25.4%)    |       |
| 2006-2011       | 597 (28.7%)    | 578 (27.8%)    |       |
| 2012-2016       | 513 (24.7%)    | 525 (25.3%)    |       |
| Race/ethnicity  |                |                | 0.01  |
| White           | 1796 (75.8%)   | 1788 (75.5%)   |       |
| Black           | 90 (3.8%)      | 81 (3.4%)      |       |
| Hispanic        | 236 (10.0%)    | 239 (10.1%)    |       |
| Asian           | 210 (8.9%)     | 228 (9.6%)     |       |
| Others          | 36 (1.5%)      | 32 (1.4%)      |       |
| Registry        |                |                | 0.03  |
| West            | 1298 (54.8%)   | 1344 (56.8%)   |       |
| Central         | 491 (20.7%)    | 452 (19.1%)    |       |
| East            | 579 (24.5%)    | 572 (24.2%)    |       |
| Marital status  |                |                | 0.01  |
| Single          | 450 (19.0%)    | 458 (19.3%)    |       |
| Married         | 1360 (57.4%)   | 1332 (56.3%)   |       |
| Others          | 77 (3.3%)      | 80 (3.4%)      |       |
| Unknown         | 481 (20.3%)    | 498 (21.0%)    |       |
| Stage           |                |                | 0.06  |
| IA              | 1128 (47.6%)   | 1207 (51.0%)   |       |
| IB              | 95 (4.0%)      | 70 (3.0%)      |       |
| IC              | 1080 (45.6%)   | 1026 (43.3%)   |       |
| INOS            | 65 (2.7%)      | 65 (2.7%)      |       |
| Tumor size (cm) |                |                | <0.01 |
| <5              | 414 (17.5%)    | 408 (17.2%)    |       |
| 5-9.9           | 479 (20.2%)    | 465 (19.6%)    |       |
| 10-14.9         | 453 (19.1%)    | 459 (19.4%)    |       |
| ≥15             | 423 (17.9%)    | 470 (19.8%)    |       |
| Unknown         | 599 (25.3%)    | 566 (23.9%)    |       |
| Oophorectomy    |                |                | <0.01 |
| No              | 10 (0.4%)      | 8 (0.3%)       |       |
| Yes             | 2358 (99.6%)   | 2358 (99.6%)   |       |
| NOS             | 0              | 2 (0.1%)       |       |
| Hysterectomy    |                |                | <0.01 |
| No              | 333 (14.1%)    | 341 (14.4%)    |       |
| Yes             | 1953 (82.5%)   | 1942 (82.0%)   |       |
| Unknown         | 82 (3.5%)      | 85 (3.6%)      |       |
| Lymphadenectomy |                |                | 0.03  |
| No              | 720 (30.4%)    | 689 (29.1%)    |       |
| Yes             | 1643 (69.4%)   | 1676 (70.8%)   |       |
| Unknown         | 5 (0.2%)       | 3 (0.1%)       |       |
| Chemotherapy    |                |                | 0.02  |
| No              | 848 (35.8%)    | 821 (34.7%)    |       |

---

|     |              |              |
|-----|--------------|--------------|
| Yes | 1520 (64.2%) | 1547 (65.3%) |
|-----|--------------|--------------|

---

Abbreviations: HGSOC, high-grade serous ovarian cancer; OCCC, ovarian clear cell carcinoma; SD, standardized difference; and NOS, not otherwise specified.  $SD \leq 0.10$  indicates good balance between the two groups.

**Supplemental Table S4. Demographics after propensity score match for MOC versus HGSOC (early stage).**

| Characteristics | HGSOC          | MOC            | SD    |
|-----------------|----------------|----------------|-------|
| Number          | <i>n</i> =2176 | <i>n</i> =2176 |       |
| Age             | 58.4 (±13.3)   | 57.3 (±15.6)   | 0.08  |
| Year            |                |                | <0.01 |
| 1988-1993       | 212 (11.2%)    | 212 (11.2%)    |       |
| 1994-1999       | 290 (15.4%)    | 295 (15.6%)    |       |
| 2000-2005       | 479 (25.4%)    | 488 (25.9%)    |       |
| 2006-2011       | 486 (25.8%)    | 473 (25.1%)    |       |
| 2012-2016       | 419 (22.2%)    | 418 (22.2%)    |       |
| Race/ethnicity  |                |                | 0.01  |
| White           | 1631 (75.0%)   | 1621 (74.5%)   |       |
| Black           | 127 (5.8%)     | 124 (5.7%)     |       |
| Hispanic        | 213 (9.8%)     | 222 (10.2%)    |       |
| Asian           | 172 (7.9%)     | 177 (8.1%)     |       |
| Others          | 33 (1.5%)      | 32 (1.5%)      |       |
| Registry        |                |                | <0.01 |
| West            | 1141 (52.4%)   | 1147 (52.7%)   |       |
| Central         | 522 (24.0%)    | 497 (22.8%)    |       |
| East            | 513 (23.6%)    | 532 (24.4%)    |       |
| Marital status  |                |                | 0.03  |
| Single          | 405 (18.6%)    | 441 (20.3%)    |       |
| Married         | 1151 (52.9%)   | 1124 (51.7%)   |       |
| Others          | 69 (3.2%)      | 76 (3.5%)      |       |
| Unknown         | 551 (25.3%)    | 535 (24.6%)    |       |
| Stage           |                |                | 0.10  |
| IA              | 1107 (50.9%)   | 1237 (56.8%)   |       |
| IB              | 119 (5.5%)     | 86 (4.0%)      |       |
| IC              | 879 (40.4%)    | 787 (36.2%)    |       |
| INOS            | 71 (3.3%)      | 66 (3.0%)      |       |
| Tumor size (cm) |                |                | 0.03  |
| <5              | 408 (18.8%)    | 406 (18.7%)    |       |
| 5-9.9           | 306 (14.1%)    | 277 (12.7%)    |       |
| 10-14.9         | 360 (16.5%)    | 310 (14.2%)    |       |
| ≥15             | 437 (20.1%)    | 520 (23.9%)    |       |
| Unknown         | 665 (30.6%)    | 663 (30.5%)    |       |
| Oophorectomy    |                |                | 0.01  |
| No              | 23 (1.1%)      | 14 (0.6%)      |       |
| Yes             | 2146 (98.6%)   | 2154 (99.0%)   |       |
| NOS             | 7 (0.3%)       | 8 (0.4%)       |       |
| Hysterectomy    |                |                | 0.01  |
| No              | 456 (21.0%)    | 464 (21.3%)    |       |
| Yes             | 1639 (75.3%)   | 1608 (73.9%)   |       |
| Unknown         | 81 (3.7%)      | 104 (4.8%)     |       |
| Lymphadenectomy |                |                | 0.03  |
| No              | 847 (38.9%)    | 882 (40.5%)    |       |
| Yes             | 1324 (60.8%)   | 1287 (59.1%)   |       |
| Unknown         | 5 (0.2%)       | 7 (0.3%)       |       |
| Chemotherapy    |                |                | 0.09  |
| No              | 1098 (50.5%)   | 1194 (54.9%)   |       |



|     |              |             |
|-----|--------------|-------------|
| Yes | 1078 (49.5%) | 982 (45.1%) |
|-----|--------------|-------------|

---

Abbreviations: HGSOC, high-grade serous ovarian cancer; MOC, mucinous ovarian carcinoma; SD, standardized difference; and NOS, not otherwise specified.  $SD \leq 0.10$  indicates good balance between the two groups.

**Supplemental Table S5. Demographics after propensity score match for LGSOC versus HGSOC (early stage).**

| Characteristics | HGSOC         | LGSOC         | SD    |
|-----------------|---------------|---------------|-------|
| Number          | <i>n</i> =671 | <i>n</i> =671 |       |
| Age             | 57.4 (±13.7)  | 56.1 (±14.8)  | 0.09  |
| Year            |               |               | <0.01 |
| 1988-1993       | 90 (14.8%)    | 95 (15.6%)    |       |
| 1994-1999       | 116 (19.0%)   | 114 (18.7%)   |       |
| 2000-2005       | 176 (28.9%)   | 165 (27.0%)   |       |
| 2006-2011       | 133 (21.8%)   | 135 (22.1%)   |       |
| 2012-2016       | 95 (15.6%)    | 101 (16.6%)   |       |
| Race/ethnicity  |               |               | 0.03  |
| White           | 517 (77.0%)   | 505 (75.3%)   |       |
| Black           | 38 (5.7%)     | 44 (6.6%)     |       |
| Hispanic        | 72 (10.7%)    | 77 (11.5%)    |       |
| Asian           | 37 (5.5%)     | 37 (5.5%)     |       |
| Others          | 7 (1.0%)      | 8 (1.2%)      |       |
| Registry        |               |               | 0.03  |
| West            | 341 (50.8%)   | 330 (49.2%)   |       |
| Central         | 139 (20.7%)   | 145 (21.6%)   |       |
| East            | 191 (28.5%)   | 196 (29.2%)   |       |
| Marital status  |               |               | 0.03  |
| Single          | 125 (18.6%)   | 129 (19.2%)   |       |
| Married         | 373 (55.6%)   | 376 (56.0%)   |       |
| Others          | 15 (2.2%)     | 17 (2.5%)     |       |
| Unknown         | 158 (23.5%)   | 149 (22.2%)   |       |
| Stage           |               |               | 0.03  |
| IA              | 344 (51.3%)   | 354 (52.8%)   |       |
| IB              | 57 (8.5%)     | 60 (8.9%)     |       |
| IC              | 243 (36.2%)   | 230 (34.3%)   |       |
| INOS            | 27 (4.0%)     | 27 (4.0%)     |       |
| Tumor size (cm) |               |               | 0.01  |
| <5              | 160 (23.8%)   | 157 (23.4%)   |       |
| 5-9.9           | 134 (20.0%)   | 128 (19.1%)   |       |
| 10-14.9         | 69 (10.3%)    | 70 (10.4%)    |       |
| ≥15             | 62 (9.2%)     | 75 (11.2%)    |       |
| Unknown         | 246 (36.7%)   | 241 (35.9%)   |       |
| Oophorectomy    |               |               | <0.01 |
| No              | 5 (0.7%)      | 5 (0.7%)      |       |
| Yes             | 665 (99.1%)   | 665 (99.1%)   |       |
| NOS*            | 1 (0.1%)      | 1 (0.1%)      |       |
| Hysterectomy    |               |               | <0.01 |
| No              | 136 (20.3%)   | 136 (20.3%)   |       |
| Yes             | 512 (76.3%)   | 511 (76.2%)   |       |
| Unknown         | 23 (3.4%)     | 24 (3.6%)     |       |
| Lymphadenectomy |               |               | 0.04  |
| No              | 320 (47.7%)   | 307 (45.8%)   |       |
| Yes             | 347 (51.7%)   | 361 (53.8%)   |       |
| Unknown         | 4 (0.6%)      | 3 (0.4%)      |       |
| Chemotherapy    |               |               | 0.07  |
| No              | 458 (68.3%)   | 478 (71.2%)   |       |

Yes                      213 (31.7%)    193 (28.8%)

---

Abbreviations: HGSOC, high-grade serous ovarian cancer; LGSOC, low-grade serous ovarian cancer; SD, standardized difference; and NOS, not otherwise specified. SD  $\leq$ 0.10 indicates good balance between the two groups.

**Supplemental Table S6. Demographics after propensity score match for OCCC versus HGSOC (advanced stage).**

| Characteristics | HGSOC          | OCCC           | SD    |
|-----------------|----------------|----------------|-------|
| Number          | <i>n</i> =1834 | <i>n</i> =1834 |       |
| Age             | 58.4 (±13.1)   | 58.3 (±12.3)   | <0.01 |
| Year            |                |                |       |
| 1988-1993       | 144 (8.7%)     | 140 (8.5%)     |       |
| 1994-1999       | 194 (11.8%)    | 183 (11.1%)    |       |
| 2000-2005       | 481 (29.2%)    | 457 (27.8%)    |       |
| 2006-2011       | 469 (28.5%)    | 475 (28.9%)    |       |
| 2012-2016       | 358 (21.7%)    | 391 (23.8%)    |       |
| Race/ethnicity  |                |                | 0.05  |
| White           | 1337 (72.9%)   | 1304 (71.1%)   |       |
| Black           | 115 (6.3%)     | 106 (5.8%)     |       |
| Hispanic        | 152 (8.3%)     | 159 (8.7%)     |       |
| Asian           | 205 (11.2%)    | 240 (13.1%)    |       |
| Others          | 25 (1.4%)      | 25 (1.4%)      |       |
| Registry        |                |                | 0.01  |
| West            | 1077 (58.7%)   | 1090 (59.4%)   |       |
| Central         | 330 (18.0%)    | 324 (17.7%)    |       |
| East            | 427 (23.3%)    | 420 (22.9%)    |       |
| Marital status  |                |                | 0.02  |
| Single          | 401 (21.9%)    | 417 (22.7%)    |       |
| Married         | 981 (53.5%)    | 971 (52.9%)    |       |
| Others          | 56 (3.1%)      | 59 (3.2%)      |       |
| Unknown         | 396 (21.6%)    | 387 (21.1%)    |       |
| Stage           |                |                | 0.06  |
| III             | 1179 (64.3%)   | 1232 (67.2%)   |       |
| IV              | 655 (35.7%)    | 602 (32.8%)    |       |
| Tumor size (cm) |                |                | <0.01 |
| <5              | 170 (9.3%)     | 155 (8.5%)     |       |
| 5-9.9           | 342 (18.6%)    | 321 (17.5%)    |       |
| 10-14.9         | 345 (18.8%)    | 383 (20.9%)    |       |
| ≥15             | 377 (20.6%)    | 414 (22.6%)    |       |
| Unknown         | 600 (32.7%)    | 561 (30.6%)    |       |
| Oophorectomy    |                |                | 0.03  |
| No              | 132 (7.2%)     | 148 (8.1%)     |       |
| Yes             | 1691 (92.2%)   | 1674 (91.3%)   |       |
| NOS             | 11 (0.6%)      | 12 (0.7%)      |       |
| Hysterectomy    |                |                | 0.03  |
| No              | 240 (13.1%)    | 253 (13.8%)    |       |
| Yes             | 1453 (79.2%)   | 1449 (79.0%)   |       |
| Unknown         | 141 (7.7%)     | 132 (7.2%)     |       |
| Lymphadenectomy |                |                | 0.02  |
| No              | 822 (44.8%)    | 794 (43.3%)    |       |
| Yes             | 988 (53.9%)    | 1022 (55.7%)   |       |
| Unknown         | 24 (1.3%)      | 18 (1.0%)      |       |
| Chemotherapy    |                |                | 0.02  |
| No              | 378 (20.6%)    | 365 (19.9%)    |       |
| Yes             | 1456 (79.4%)   | 1469 (80.1%)   |       |

Abbreviations: HGSOC, high-grade serous ovarian cancer; OCCC, ovarian clear cell carcinoma; SD, standardized difference; and NOS, not otherwise specified.  $SD \leq 0.10$  indicates good balance between the two groups.

**Supplemental Table S7. Demographics after propensity score match for MOC versus HGSOC (advanced stage).**

| Characteristics | HGSOC          | MOC            | SD    |
|-----------------|----------------|----------------|-------|
| Number          | <i>n</i> =2557 | <i>n</i> =2557 |       |
| Age             | 62.5 (±13.2)   | 62.4 (±15.3)   | <0.01 |
| Year            |                |                | 0.03  |
| 1988-1993       | 367 (15.6%)    | 381 (16.2%)    |       |
| 1994-1999       | 481 (20.5%)    | 449 (19.1%)    |       |
| 2000-2005       | 770 (32.8%)    | 743 (31.6%)    |       |
| 2006-2011       | 477 (20.3%)    | 480 (20.4%)    |       |
| 2012-2016       | 254 (10.8%)    | 296 (12.6%)    |       |
| Race/ethnicity  |                |                | <0.01 |
| White           | 1785 (69.8%)   | 1757 (68.7%)   |       |
| Black           | 266 (10.4%)    | 304 (11.9%)    |       |
| Hispanic        | 301 (11.8%)    | 299 (11.7%)    |       |
| Asian           | 172 (6.7%)     | 158 (6.2%)     |       |
| Others          | 33 (1.3%)      | 39 (1.5%)      |       |
| Registry        |                |                | 0.02  |
| West            | 1331 (52.1%)   | 1362 (53.3%)   |       |
| Central         | 595 (23.3%)    | 577 (22.6%)    |       |
| East            | 631 (24.7%)    | 618 (24.2%)    |       |
| Marital status  |                |                | <0.01 |
| Single          | 464 (18.1%)    | 481 (18.8%)    |       |
| Married         | 1168 (45.7%)   | 1133 (44.3%)   |       |
| Others          | 65 (2.5%)      | 75 (2.9%)      |       |
| Unknown         | 860 (33.6%)    | 868 (33.9%)    |       |
| Stage           |                |                | 0.02  |
| III             | 1424 (55.7%)   | 1394 (54.5%)   |       |
| IV              | 1133 (44.3%)   | 1163 (45.5%)   |       |
| Tumor size (cm) |                |                | <0.01 |
| <5              | 173 (6.8%)     | 173 (6.8%)     |       |
| 5-9.9           | 263 (10.3%)    | 269 (10.5%)    |       |
| 10-14.9         | 292 (11.4%)    | 265 (10.4%)    |       |
| ≥15             | 432 (16.9%)    | 461 (18.0%)    |       |
| Unknown         | 1397 (54.6%)   | 1389 (54.3%)   |       |
| Oophorectomy    |                |                | 0.06  |
| No              | 604 (23.6%)    | 673 (26.3%)    |       |
| Yes             | 1902 (74.4%)   | 1830 (71.6%)   |       |
| NOS*            | 51 (2.0%)      | 54 (2.1%)      |       |
| Hysterectomy    |                |                | 0.07  |
| No              | 887 (34.7%)    | 972 (38.0%)    |       |
| Yes             | 1371 (53.6%)   | 1313 (51.3%)   |       |
| Unknown         | 299 (11.7%)    | 272 (10.6%)    |       |
| Lymphadenectomy |                |                | <0.01 |
| No              | 1787 (69.9%)   | 1794 (70.2%)   |       |
| Yes             | 740 (28.9%)    | 721 (28.2%)    |       |
| Unknown         | 30 (1.2%)      | 42 (1.6%)      |       |
| Chemotherapy    |                |                | 0.05  |
| No              | 878 (34.3%)    | 934 (36.5%)    |       |
| Yes             | 1679 (65.7%)   | 1623 (63.5%)   |       |

Abbreviations: HGSOC, high-grade serous ovarian cancer; MOC, mucinous ovarian carcinoma; SD, standardized difference; and NOS, not otherwise specified.  $SD \leq 0.10$  indicates good balance between the two groups.

**Supplemental Table S8. Demographics after propensity score match for LGSOC versus HGSOC (advanced stage).**

| Characteristics | HGSOC          | OCCC           | SD    |
|-----------------|----------------|----------------|-------|
| Number          | <i>n</i> =1095 | <i>n</i> =1095 |       |
| Age             | 56.8 (±13.5)   | 56.3 (±15.8)   | 0.03  |
| Year            |                |                | <0.01 |
| 1988-1993       | 134 (13.3%)    | 128 (12.7%)    |       |
| 1994-1999       | 167 (16.6%)    | 170 (16.9%)    |       |
| 2000-2005       | 316 (31.4%)    | 327 (32.5%)    |       |
| 2006-2011       | 240 (23.8%)    | 221 (21.9%)    |       |
| 2012-2016       | 150 (14.9%)    | 161 (16.0%)    |       |
| Race/ethnicity  |                |                | 0.02  |
| White           | 850 (77.6%)    | 857 (78.3%)    |       |
| Black           | 80 (7.3%)      | 78 (7.1%)      |       |
| Hispanic        | 109 (10.0%)    | 110 (10.0%)    |       |
| Asian           | 44 (4.0%)      | 37 (3.4%)      |       |
| Others*         | 12 (1.1%)      | 13 (1.2%)      |       |
| Registry        |                |                | <0.01 |
| West            | 600 (54.8%)    | 593 (54.2%)    |       |
| Central         | 214 (19.5%)    | 225 (20.5%)    |       |
| East            | 281 (25.7%)    | 277 (25.3%)    |       |
| Marital status  |                |                | 0.03  |
| Single          | 192 (17.5%)    | 204 (18.6%)    |       |
| Married         | 622 (56.8%)    | 591 (54.0%)    |       |
| Others          | 28 (2.6%)      | 23 (2.1%)      |       |
| Unknown         | 253 (23.1%)    | 277 (25.3%)    |       |
| Stage           |                |                | 0.08  |
| III             | 803 (73.3%)    | 841 (76.8%)    |       |
| IV              | 292 (26.7%)    | 254 (23.2%)    |       |
| Tumor size (cm) |                |                | 0.03  |
| <5              | 171 (15.6%)    | 181 (16.5%)    |       |
| 5-9.9           | 222 (20.3%)    | 228 (20.8%)    |       |
| 10-14.9         | 129 (11.8%)    | 127 (11.6%)    |       |
| ≥15             | 110 (10.0%)    | 100 (9.1%)     |       |
| Unknown         | 463 (42.3%)    | 459 (41.9%)    |       |
| Oophorectomy    |                |                | 0.05  |
| No              | 68 (6.2%)      | 56 (5.1%)      |       |
| Yes             | 1018 (93.0%)   | 1029 (94.0%)   |       |
| NOS*            | 9 (0.8%)       | 10 (0.9%)      |       |
| Hysterectomy    |                |                | 0.06  |
| No              | 216 (19.7%)    | 181 (16.5%)    |       |
| Yes             | 750 (68.5%)    | 783 (71.5%)    |       |
| Unknown         | 129 (11.8%)    | 131 (12.0%)    |       |
| Lymphadenectomy |                |                | 0.02  |
| No              | 557 (50.9%)    | 548 (50.0%)    |       |
| Yes             | 531 (48.5%)    | 540 (49.3%)    |       |
| Unknown         | 7 (0.6%)       | 7 (0.6%)       |       |
| Chemotherapy    |                |                | 0.03  |
| No              | 234 (21.4%)    | 248 (22.6%)    |       |
| Yes             | 861 (78.6%)    | 847 (77.4%)    |       |



Abbreviations: HGSOC, high-grade serous ovarian cancer; LGSOC, low-grade serous ovarian cancer; SD, standardized difference; and NOS, not otherwise specified.  $SD \leq 0.10$  indicates good balance between the two groups.
